# Supplementary material for: Comparing “people-like-me” and linear mixed model predictions of functional recovery following knee arthroplasty
Source: bioRxiv or medRxiv preprint supplement (doi:10.1101/2022.03.09.22271922), 2022-06-22
Supplement: Supplementary file [file media-1.pdf]

# Supplemental Materials: Linear Mixed Model Summary and Prediction

## Required packages

```
library(tidyverse)
library(magrittr)
library(nlme)
library(JMbayes)
library(lspline)
library(knitr)
library(kableExtra)
```

## Final Linear Mixed Model

```
#read in data
dat <- readRDS("Data/training_dat_final.rds")

# Standardize time and format id as factor
dat %<>% mutate(id = as.factor(id),
               time.stand = as.numeric((time - mean(time))/sd(time)))

# Final LMM model
lmm.final <- lme(log(tug) ~ 1 + bmi*sex + age + lspline(time.stand, knots = c(-0.8999027, -0.5233489)),
                random = list(id = pdDiag(~1+ time.stand)),
                data = dat,
                method = "REML")

# Note: knot values of c(-0.8999027, -0.5233489) are the standardized values of c(14, 60)

coef(summary(lmm.final)) %>% kbl(booktabs = T)
```

|                                                         | Value       | Std.Error | DF   | t-value    | p-value   |
|---------------------------------------------------------|-------------|-----------|------|------------|-----------|
| (Intercept)                                             | -11.8005261 | 0.3180905 | 1059 | -37.098019 | 0.0000000 |
| bmi                                                     | 0.0081242   | 0.0043244 | 312  | 1.878695   | 0.0612184 |
| sex2                                                    | -0.2437595  | 0.1693580 | 312  | -1.439315  | 0.1510637 |
| age                                                     | 0.0117493   | 0.0017090 | 312  | 6.874799   | 0.0000000 |
| lspline(time.stand, knots = c(-0.8999027, -0.5233489))1 | -14.6932797 | 0.2754183 | 1059 | -53.348962 | 0.0000000 |
| lspline(time.stand, knots = c(-0.8999027, -0.5233489))2 | -1.1571083  | 0.0561612 | 1059 | -20.603333 | 0.0000000 |
| lspline(time.stand, knots = c(-0.8999027, -0.5233489))3 | -0.0307099  | 0.0072268 | 1059 | -4.249439  | 0.0000233 |
| bmi:sex2                                                | 0.0122935   | 0.0054924 | 312  | 2.238258   | 0.0259094 |

## Create predictions from the final LMM

```

# Create vector of time from 1:425 and convert to standardized time
time.vector <- c(1:425)
time.vector <- (time.vector - mean(dat$time))/sd(dat$time)

# Create dataframe with only baseline TUG values
dat.baseline <- dat %>% group_by(id) %>% arrange(time) %>% slice(1L)

# Create predictions using baseline TUG value with 50% prediction interval

m.pred.5 <- IndvPred_lme(lmeObject = lmm.final,
  newdata = dat.baseline,
  timeVar = c("time.stand"),
  all_times = TRUE,
  return_data = TRUE,
  interval = "prediction",
  times = time.vector,
  level = 0.5,
  M = 500)

# Create predictions using baseline TUG value with 80% prediction interval

m.pred.9 <- IndvPred_lme(lmeObject = lmm.final,
  newdata = dat.baseline,
  timeVar = "time.stand",
  all_times = TRUE,
  return_data = TRUE,
  interval = "prediction",
  times = time.vector,
  level = 0.8,
  M = 500)

# convert predictions out of log scale
m.pred.5 %<>% mutate(C50 = exp(pred),
  C75 = exp(upp),

```

```
      C25 = exp(low))  
m.pred.9 %<>% mutate(C50 = exp(pred),  
                      C90 = exp(upp),  
                      C10 = exp(low))
```
